# Supplementary material for: Sevoflurane Induces a Cyclophilin D-Dependent Decrease of Neural Progenitor Cells Migration
Source: MDPI journal article supplement (doi:10.3390/ijms24076746), 2023-04-04
Supplement: s1 [file s1]

**Table S1.** Proteomics comprehensive results following sevoflurane treatment.

| Term                                                                       | PValue   | FDR( false disc | Genes                                                                                                                                                                                          | Pop Hits | Pop Total | Fold Enrichme | Bonferroni  | Benjamini   | List Total | Count | %       |
|----------------------------------------------------------------------------|----------|-----------------|------------------------------------------------------------------------------------------------------------------------------------------------------------------------------------------------|----------|-----------|---------------|-------------|-------------|------------|-------|---------|
| GO:0008137~NADH dehydrogenase (ubiquinone) activity                        | 3.80E-37 | 4.75E-34        | P19404, O43676, P49821, O75489, Q9P0J0, O96000, P51970, O00483, O75438, O95139, P56556, O43678, O43181, P17568, O95299, Q9UI09, Q16718, Q9Y6M9, O75251, O95167, O75380, Q16795, O95182, O75306 | 48       | 16881     | 66.46062992   | 7.45E-35    | 7.45E-35    | 127        | 24    | 18.75   |
| GO:0046933~proton-transporting ATP synthase activity, rotational mechanism | 1.24E-15 | 1.52E-12        | P24539, P06576, P48201, O75964, P48047, P30049, P25705, O75947, P36542, P56381                                                                                                                 | 17       | 16881     | 78.18897638   | 2.39E-13    | 1.20E-13    | 127        | 10    | 7.8125  |
| GO:0003755~peptidyl-prolyl cis-trans isomerase activity                    | 2.75E-14 | 3.44E-11        | P62937, Q9Y237, Q9NYL4, Q14318, P23284, Q15257, Q02790, P62942, P30405, P26885, Q08752, Q00688                                                                                                 | 46       | 16881     | 34.67511126   | 5.40E-12    | 1.80E-12    | 127        | 12    | 9.375   |
| GO:0022857~transmembrane transporter activity                              | 2.40E-12 | 3.00E-09        | P24539, P06576, O75964, P48047, P30049, P18859, P25705, P56385, O75947, P36542, P56381                                                                                                         | 49       | 16881     | 29.8394665    | 4.70E-10    | 1.18E-10    | 127        | 11    | 8.59375 |
| GO:0003954~NADH dehydrogenase activity                                     | 4.24E-12 | 5.30E-09        | P49821, O75489, Q9P0J0, O75438, O75251, Q16795, O75306                                                                                                                                         | 8        | 16881     | 116.3061024   | 8.31E-10    | 1.66E-10    | 127        | 7     | 5.46875 |
| GO:0004722~protein serine/threonine phosphatase activity                   | 4.22E-10 | 5.27E-07        | P99999, P63151, P53041, P36873, P62140, P30153, Q14738, Q08209, P16298, P62136                                                                                                                 | 58       | 16881     | 22.91745859   | 8.26E-08    | 1.38E-08    | 127        | 10    | 7.8125  |
| GO:0004129~cytochrome-c oxidase activity                                   | 1.93E-09 | 2.41E-06        | P13073, P14406, P10606, P14854, P20674, O00483, P00403, P15954                                                                                                                                 | 30       | 16881     | 35.44566929   | 3.77E-07    | 5.39E-08    | 127        | 8     | 6.25    |
| GO:0016887~ATPase activity                                                 | 1.24E-07 | 1.55E-04        | P24539, P06576, O75964, P48047, Q15257, P30049, P18859, P25705, P56385, O75947, P36542, P56381                                                                                                 | 183      | 16881     | 8.716148186   | 2.43E-05    | 3.04E-06    | 127        | 12    | 9.375   |
| GO:0004674~protein serine/threonine kinase activity                        | 1.36E-07 | 1.70E-04        | Q8TDC3, O96013, Q5VT25, Q8N568, Q13177, O15075, Q9Y376, Q7L7X3, Q9UQM7, Q13555, Q7KZI7, Q8IU85, Q13554, Q16513, O75914, Q13557                                                                 | 376      | 16881     | 5.656223823   | 2.67E-05    | 2.96E-06    | 127        | 16    | 12.5    |
| GO:0005528~FK506 binding                                                   | 3.03E-07 | 3.79E-04        | Q9NYL4, Q14318, Q02790, P62942, P26885, Q00688                                                                                                                                                 | 20       | 16881     | 39.87637795   | 5.94E-05    | 5.94E-06    | 127        | 6     | 4.6875  |
| GO:0008601~protein phosphatase type 2A regulator activity                  | 3.96E-07 | 4.94E-04        | Q13362, P63151, Q15257, P30153, Q14738, Q16537                                                                                                                                                 | 21       | 16881     | 37.97750281   | 7.75E-05    | 7.05E-06    | 127        | 6     | 4.6875  |
| GO:0004721~phosphoprotein phosphatase activity                             | 9.85E-07 | 0.001229959     | P53041, P36873, P62140, P67775, Q08209, P16298, P62136                                                                                                                                         | 45       | 16881     | 20.67664042   | 1.93E-04    | 1.61E-05    | 127        | 7     | 5.46875 |
| GO:0019888~protein phosphatase regulator activity                          | 2.20E-06 | 0.002748865     | Q13362, P63151, Q15257, P30153, Q14738, Q16537                                                                                                                                                 | 29       | 16881     | 27.50095031   | 4.31E-04    | 3.32E-05    | 127        | 6     | 4.6875  |
| GO:0015078~hydrogen ion transmembrane transporter activity                 | 3.67E-06 | 0.004578486     | P24539, P48201, O75964, P18859, P56385, O75947                                                                                                                                                 | 32       | 16881     | 24.92273622   | 7.18E-04    | 5.13E-05    | 127        | 6     | 4.6875  |
| GO:0009055~electron carrier activity                                       | 4.88E-06 | 0.006096156     | P99999, P19404, Q9UI09, O75489, P00390, P20674, O75380, O75306                                                                                                                                 | 90       | 16881     | 11.8152231    | 9.56E-04    | 6.38E-05    | 127        | 8     | 6.25    |
| GO:0004683~calmodulin-dependent protein kinase activity                    | 1.95E-05 | 0.024362414     | Q9UQM7, Q13555, Q8IU85, Q13554, Q13557                                                                                                                                                         | 22       | 16881     | 30.20937724   | 0.003815491 | 2.39E-04    | 127        | 5     | 3.90625 |
| GO:0005215~transporter activity                                            | 2.07E-05 | 0.025891959     | P05141, P06576, P48201, P48047, P30049, P12236, P18859, P55087, P12235, Q9UJS0                                                                                                                 | 202      | 16881     | 6.580260388   | 0.004054583 | 2.39E-04    | 127        | 10    | 7.8125  |
| GO:0046961~proton-transporting ATPase activity, rotational mechanism       | 3.90E-05 | 0.048647672     | P06576, P30049, P25705, P36542, P56381                                                                                                                                                         | 26       | 16881     | 25.56178074   | 0.007605329 | 4.24E-04    | 127        | 5     | 3.90625 |
| GO:0032403~protein complex binding                                         | 1.57E-04 | 0.196509523     | Q96HS1, P63151, P36873, P23284, P51970, O00483, Q16795, P21796, P62136                                                                                                                         | 206      | 16881     | 5.807239508   | 0.030390188 | 0.001622973 | 127        | 9     | 7.03125 |
| GO:0015207~adenine transmembrane transporter activity                      | 1.65E-04 | 0.205937917     | P05141, P12236, P12235                                                                                                                                                                         | 3        | 16881     | 132.9212598   | 0.031826321 | 0.001615882 | 127        | 3     | 2.34375 |
| GO:0003735~structural constituent of ribosome                              | 2.62E-04 | 0.326853045     | Q6NUK1, P05141, Q9BV35, O75746, Q6KCM7, P12236, O95182, P12235, Q9UJS0                                                                                                                         | 222      | 16881     | 5.388699723   | 0.050068449 | 0.00244298  | 127        | 9     | 7.03125 |
| GO:0005516~calmodulin binding                                              | 5.43E-04 | 0.676255472     | P54750, Q9UQM7, Q13555, Q08209, Q8IU85, Q13554, Q13557, P16298                                                                                                                                 | 189      | 16881     | 5.626296713   | 0.100989861 | 0.004827445 | 127        | 8     | 6.25    |
